# Supplementary material for: Kinetics of Moisture Loss and Oil Absorption of Pork Rinds during Deep-Fat, Microwave-Assisted and Vacuum Frying
Source: MDPI journal article supplement (doi:10.3390/foods10123025), 2021-12-06
Supplement: s1 [file s1]

## Supplementary files

Table S1a. Correlation coefficients between traditional frying time of pork rind and various experimental results.

| a              | Water content | Water activity | Breaking force | Oil content | Puffing ratio | CIE L*   | CIE a*   | CIE b* | CIE ΔE |
|----------------|---------------|----------------|----------------|-------------|---------------|----------|----------|--------|--------|
| Water content  | 1             |                |                |             |               |          |          |        |        |
| Water activity | 0.956**       | 1              |                |             |               |          |          |        |        |
| Breaking force | 0.691**       | 0.723**        | 1              |             |               |          |          |        |        |
| Oil content    | -0.942**      | -0.953**       | -0.648**       | 1           |               |          |          |        |        |
| Puffing ratio  | -0.880**      | -0.902**       | -0.752**       | 0.897**     | 1             |          |          |        |        |
| CIE L*         | -0.706**      | -0.782**       | -0.605**       | 0.762**     | 0.701**       | 1        |          |        |        |
| CIE a*         | 0.467*        | -0.549**       | 0.375          | -0.480*     | -0.465*       | -0.778** | 1        |        |        |
| CIE b*         | -0.229        | -0.200         | 0.041          | 0.335       | 0.203         | 0.056    | 0.355    | 1      |        |
| CIE ΔE         | -0.741**      | -0.799**       | -0.581**       | 0.788**     | 0.700**       | 0.987**  | -0.771** | 0.043  | 1      |

\* indicate significance at  $p < 0.05$ ; \*\* indicate significance at  $p < 0.01$ . Not include  $t = 0$  in statistical analysis.

Table S1b. Correlation coefficients between traditional frying time of pork rind and various experimental results.

| b              | Water content | Water activity | Breaking force | Oil content | Puffing ratio | CIE L*   | CIE a*   | CIE b* | CIE ΔE |
|----------------|---------------|----------------|----------------|-------------|---------------|----------|----------|--------|--------|
| Water content  | 1             |                |                |             |               |          |          |        |        |
| Water activity | 0.929**       | 1              |                |             |               |          |          |        |        |
| Breaking force | 0.691**       | 0.723**        | 1              |             |               |          |          |        |        |
| Oil content    | -0.957**      | -0.852**       | -0.648**       | 1           |               |          |          |        |        |
| Puffing ratio  | -0.880**      | -0.902**       | -0.752**       | 0.705**     | 1             |          |          |        |        |
| CIE L*         | -0.897**      | -0.791**       | -0.605**       | 0.938**     | 0.701**       | 1        |          |        |        |
| CIE a*         | 0.818**       | -0.701**       | 0.375          | -0.857*     | -0.465*       | -0.944** | 1        |        |        |
| CIE b*         | -0.363        | -0.319         | 0.041          | 0.397       | 0.203         | 0.295    | -0.102   | 1      |        |
| CIE ΔE         | -0.741**      | -0.799**       | -0.581**       | 0.788**     | 0.700**       | 0.987**  | -0.771** | 0.043  | 1      |

\* indicate significance at  $p < 0.05$ ; \*\* indicate significance at  $p < 0.01$ .

Include  $t = 0$  in statistical analysis.

Table S2a. Correlation coefficients between microwave frying time of pork rind and various experimental results.

| a              | Water content | Water activity | Breaking force | Oil content | Puffing ratio | CIE L* | CIE a* | CIE b* | CIE ΔE |
|----------------|---------------|----------------|----------------|-------------|---------------|--------|--------|--------|--------|
| Water content  | 1             |                |                |             |               |        |        |        |        |
| Water activity | 0.952**       | 1              |                |             |               |        |        |        |        |

|                |          |          |          |         |         |         |        |        |   |
|----------------|----------|----------|----------|---------|---------|---------|--------|--------|---|
| Breaking force | 0.897**  | 0.901**  | 1        |         |         |         |        |        |   |
| Oil content    | -0.951** | -0.897** | -0.876** | 1       |         |         |        |        |   |
| Puffing ratio  | -0.941** | -0.950** | -0.925** | 0.913** | 1       |         |        |        |   |
| CIE L*         | -0.929** | -0.884** | -0.842** | 0.929** | 0.916** | 1       |        |        |   |
| CIE a*         | 0.352    | 0.254    | 0.171    | -0.397  | -0.355  | -0.475* | 1      |        |   |
| CIE b*         | -0.535*  | -0.503*  | -0.417   | 0.457*  | 0.333   | 0.393   | 0.357  | 1      |   |
| CIE ΔE         | -0.943** | -0.892** | -0.838** | 0.932** | 0.898** | 0.990** | -0.400 | 0.514* | 1 |

\* indicate significance at  $p < 0.05$ ; \*\* indicate significance at  $p < 0.01$ . Not include  $t = 0$  in statistical analysis.

Table S2b. Correlation coefficients between microwave frying time of pork rind and various experimental results.

| b              | Water content | Water activity | Breaking force | Oil content | Puffing ratio | CIE L* | CIE a* | CIE b* | CIE ΔE |
|----------------|---------------|----------------|----------------|-------------|---------------|--------|--------|--------|--------|
| Water content  | 1             |                |                |             |               |        |        |        |        |
| Water activity | 0.969**       | 1              |                |             |               |        |        |        |        |

|                |          |          |          |          |         |          |          |        |   |
|----------------|----------|----------|----------|----------|---------|----------|----------|--------|---|
| Breaking force | 0.897**  | 0.901**  | 1        |          |         |          |          |        |   |
| Oil content    | -0.897** | -0.923** | -0.876** | 1        |         |          |          |        |   |
| Puffing ratio  | -0.941** | -0.950** | -0.925** | 0.913**  | 1       |          |          |        |   |
| CIE L*         | -0.977** | -0.924** | -0.842** | 0.835**  | 0.916** | 1        |          |        |   |
| CIE a*         | 0.840**  | 0.739**  | 0.171    | -0.649** | -0.355  | -0.898** | 1        |        |   |
| CIE b*         | -0.878** | -0.820*  | -0.417   | 0.694**  | 0.333   | 0.876**  | -0.704** | 1      |   |
| CIE ΔE         | -0.943** | -0.892** | -0.838** | 0.932**  | 0.898** | 0.990**  | -0.400   | 0.514* | 1 |

\* indicate significance at  $p < 0.05$ ; \*\* indicate significance at  $p < 0.01$ .

Include  $t = 0$  in statistical analysis.

Table S3a. Correlation coefficients between vacuum frying time of pork rind and various experimental results.

| a              | Water content | Water activity | Breaking force | Oil content | Puffing ratio | CIE L*   | CIE a* | CIE b* | CIE ΔE |
|----------------|---------------|----------------|----------------|-------------|---------------|----------|--------|--------|--------|
| Water content  | 1             |                |                |             |               |          |        |        |        |
| Water activity | 0.952**       | 1              |                |             |               |          |        |        |        |
| Breaking force | 0.857**       | -0.904**       | 1              |             |               |          |        |        |        |
| Oil content    | -0.769**      | -0.745**       | -0.703**       | 1           |               |          |        |        |        |
| Puffing ratio  | -0.976**      | -0.981**       | -0.901**       | 0.787**     | 1             |          |        |        |        |
| CIE L*         | -0.867**      | -0.875**       | -0.821**       | 0.744**     | 0.862**       | 1        |        |        |        |
| CIE a*         | 0.652**       | 0.604**        | 0.543*         | -0.633**    | -0.610**      | -0.707** | 1      |        |        |

|        |          |          |          |         |         |         |          |         |   |
|--------|----------|----------|----------|---------|---------|---------|----------|---------|---|
| CIE b* | -0.820** | -0.826** | -0.794** | 0.588*  | 0.802** | 0.893** | -0.448   | 1       |   |
| CIE ΔE | -0.880** | -0.886** | -0.833** | 0.732** | 0.873** | 0.997** | -0.687** | 0.920** | 1 |

\* indicate significance at  $p < 0.05$ ; \*\* indicate significance at  $p < 0.01$ .

Not include  $t = 0$  in statistical analysis.

Table S3b. Correlation coefficients between vacuum frying time of pork rind and various experimental results.

| b              | Water content | Water activity | Breaking force | Oil content | Puffing ratio | CIE L*   | CIE a*   | CIE b*  | CIE ΔE |
|----------------|---------------|----------------|----------------|-------------|---------------|----------|----------|---------|--------|
| Water content  | 1             |                |                |             |               |          |          |         |        |
| Water activity | 0.941**       | 1              |                |             |               |          |          |         |        |
| Breaking force | 0.857**       | -0.904**       | 1              |             |               |          |          |         |        |
| Oil content    | -0.902**      | -0.819**       | -0.703**       | 1           |               |          |          |         |        |
| Puffing ratio  | -0.976**      | -0.981**       | -0.901**       | 0.787**     | 1             |          |          |         |        |
| CIE L*         | -0.962**      | -0.905**       | -0.821**       | 0.870**     | 0.862**       | 1        |          |         |        |
| CIE a*         | 0.873**       | 0.769**        | 0.543*         | -0.759**    | -0.610**      | -0.905** | 1        |         |        |
| CIE b*         | -0.849**      | -0.877**       | -0.794**       | 0.706**     | 0.802**       | 0.882**  | -0.700** | 1       |        |
| CIE ΔE         | -0.880**      | -0.886**       | -0.833**       | 0.732**     | 0.873**       | 0.997**  | -0.687** | 0.920** | 1      |

indicate significance at  $p < 0.05$ ; \*\* indicate significance at  $p < 0.01$ .

Include  $t = 0$  in statistical analysis.

Table S4 The correlation coefficient between the vacuum frying time and the test results.

| a                 | Frying time | Water content | Oil content | Breaking force | Water activity | The puffing ratio |
|-------------------|-------------|---------------|-------------|----------------|----------------|-------------------|
| Frying time       | 1           |               |             |                |                |                   |
| Water content     | -0.899**    | 1             |             |                |                |                   |
| Oil content       | -0.197      | 0.273         | 1           |                |                |                   |
| Breaking force    | 0.462       | -0.672**      | -0.346      | 1              |                |                   |
| Water activity    | -0.939**    | 0.958**       | 0.343       | -0.567**       | 1              |                   |
| The puffing ratio | 0.872**     | -0.884**      | -0.221      | 0.605**        | -0.883**       | 1                 |

  

| b              | Frying time | Water content | Oil content | Breaking force | Water activity | The puffing ratio |
|----------------|-------------|---------------|-------------|----------------|----------------|-------------------|
| Frying time    | 1           |               |             |                |                |                   |
| Water content  | -0.751**    | 1             |             |                |                |                   |
| Oil content    | -0.480      | -0.846**      | 1           |                |                |                   |
| Breaking force | 0.462       | -0.672**      | -0.346      | 1              |                |                   |

|                   |         |          |        |          |         |   |
|-------------------|---------|----------|--------|----------|---------|---|
| Water activity    | -       | 0.759**  | -0.433 | -0.567** | 1       |   |
| The puffing ratio | 0.872** | -0.884** | -0.221 | 0.605**  | -       | 1 |
|                   |         |          |        |          | 0.883** |   |

---

\*\* indicate significance at  $p < 0.01$ .

(a) Not include  $t = 0$  in statistical analysis

(b) Include  $t = 0$  in statistical analysis

Dried pork skin:

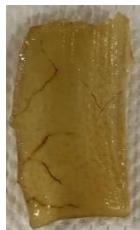

Traditional deep frying:

(0.5 min) (1 min) (1.5 min) (2 min) (3 min) (4 min) (5 min)

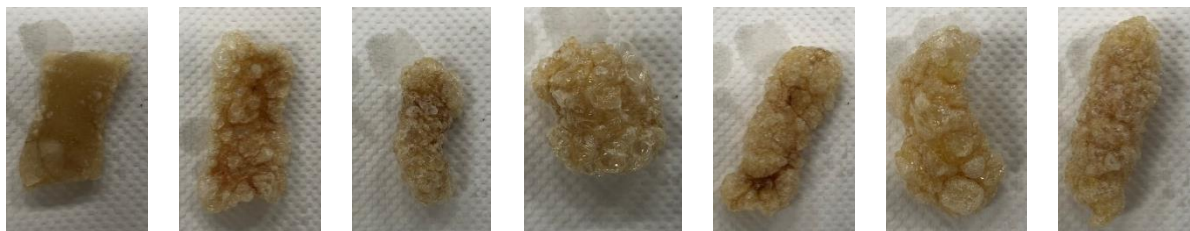

Microwave assisted frying:

(0.5 min) (1 min) (1.5 min) (2 min) (3 min) (4 min) (5 min)

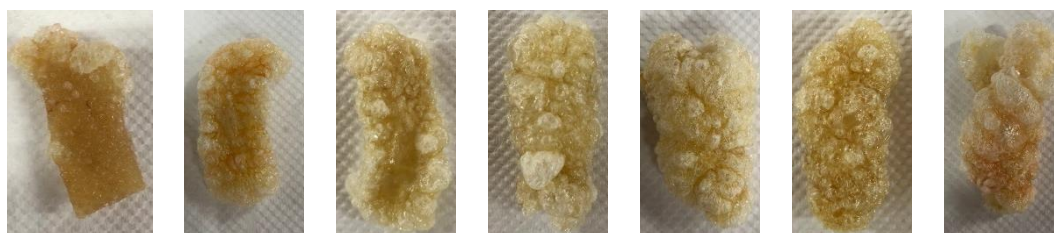

Vacuum frying:

(4 min) (8 min) (12 min) (16 min) (20 min) (24 min)

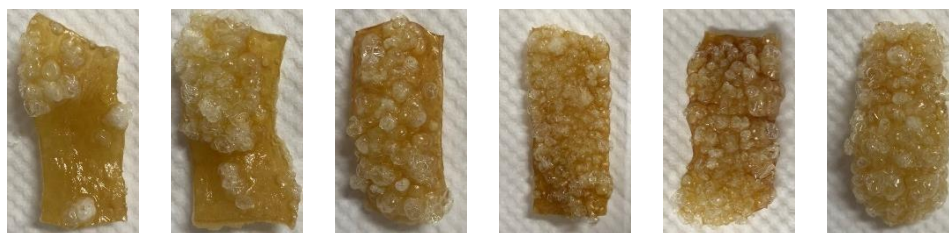

Figure S1 Appearance of fried pork rind by different frying methods and frying time.
